# Supplementary material for: Effects of NaHCO3 Stress on Black Locust (Robinia pseudoacacia L.) Physiology, Biochemistry, and Rhizosphere Bacterial Communities
Source: MDPI journal article supplement (doi:10.3390/microorganisms11122941), 2023-12-08
Supplement: s1 [file s1]

**Table S1.** Basic properties of test soil.

| physicochemical indexes         | numerical value |
|---------------------------------|-----------------|
| pH                              | 6.6             |
| organic matter content          | 20.36 g/kg      |
| total nitrogen content          | 99.8 g/kg       |
| total phosphorus content        | 22.4 g/kg       |
| total potassium content         | 7.11 g/kg       |
| alkaline hydrolyzed<br>nitrogen | 136 mg/kg       |
| available phosphorus            | 83 mg/kg        |
| available potassium             | 77.1 mg/kg      |

**Table S2.** Physiological responses of plants under NaHCO<sub>3</sub> stress.

| Variety | Treatment         | Plant height<br>(cm) | ground diameter<br>(mm) | Plant biomass<br>(g) | Chlorophyll content<br>(mg/g) | Relative conductivity (%) | MDA<br>(μmol/g) | SOD<br>(U/g) | POD(U/g·min <sup>-1</sup> ) | CAT<br>(U/g·min <sup>-1</sup> ) | Pro(μg/g)    | SS(mg/g)    | SP(mg/g)    |
|---------|-------------------|----------------------|-------------------------|----------------------|-------------------------------|---------------------------|-----------------|--------------|-----------------------------|---------------------------------|--------------|-------------|-------------|
| 2×      | A0                | 11.47±1.02a          | 1.04±0.09a              | 17.43±0.26a          | 25.27±0.56a                   | 22.74±2.08d               | 3.46±0.36d      | 10.91±0.5a   | 15.87±1.4a                  | 37.48±1.11a                     | 21.54±1.18d  | 27.25±1.03c | 6.15±0.39c  |
|         |                   |                      |                         |                      |                               |                           |                 |              |                             |                                 |              |             |             |
|         | A1                | 6.31±0.59b           | 0.50±0.02b              | 16±0.48b             | 11.22±0.5b                    | 44.55±0.88c               | 7.85±0.3c       | 9.08±0.19b   | 13.2±0.58b                  | 34.48±0.84b                     | 134.61±3.6c  | 43.25±1.48b | 6.79±0.25b  |
|         |                   |                      |                         |                      |                               |                           |                 |              |                             |                                 |              |             |             |
|         | A2                | 5.08±0.52bc          | 0.33±0.04c              | 14.82±0.32c          | 9.76±0.48c                    | 48.57±0.64b               | 2.77±0.54b      | 10.29±0.47a  | 15.18±0.71a                 | 37.19±0.66a                     | 196.61±4.04b | 46.6±1.06a  | 7.12±0.28b  |
|         |                   |                      |                         |                      |                               |                           |                 |              |                             |                                 |              |             |             |
|         | A3                | 3.76±0.38c           | 0.27±0.03c              | 13.58±0.33d          | 7.19±0.22d                    | 53.72±1.05a               | 15.87±0.53a     | 7.3±0.38c    | 12.76±0.61b                 | 27.28±0.46b                     | 221.51±4.55a | 41.91±1.32b | 8.25±0.32a  |
|         |                   |                      |                         |                      |                               |                           |                 |              |                             |                                 |              |             |             |
|         | B0                | 12.57±0.62A          | 1.11±0.12A              | 14.73±0.38A          | 24.23±0.58A                   | 22.27±1.62D               | 3±0.26D         | 10.36±0.54D  | 19.72±0.88D                 | 41.53±1.07D                     | 22.61±2.15D  | 27.44±1.05D | 6.32±0.41D  |
|         |                   |                      |                         |                      |                               |                           |                 |              |                             |                                 |              |             |             |
|         | B1                | 8.91±0.26bB          | 0.82±0.05B              | 14.53±0.3A           | 13.77±0.71B                   | 40.59±0.82B               | 7.11±0.28C      | 14.69±0.53C  | 23.25±0.54C                 | 47.42±0.81C                     | 114.68±2.96C | 46.78±0.87C | 10.23±0.4C  |
|         |                   |                      |                         |                      |                               |                           |                 |              |                             |                                 |              |             |             |
| 4×      | B2                | 7.06±0.35C           | 0.67±0.02C              | 13.66±0.14B          | 12.83±0.43B                   | 44.6±0.83B                | 8.71±0.55B      | 16.82±0.56B  | 26.9±0.71B                  | 51.49±0.95B                     | 158.31±4.19B | 54.35±1.77B | 11.55±0.33B |
|         |                   |                      |                         |                      |                               |                           |                 |              |                             |                                 |              |             |             |
|         | B3                | 5.51±0.23D           | 0.48±0.02D              | 12.84±0.18C          | 11.22±0.54C                   | 49.66±0.66A               | 11.2±0.47A      | 18.68±0.57A  | 30.21±0.64A                 | 56.14±0.66A                     | 200.6±5.64A  | 59.57±2.09A | 12.65±0.31A |
|         |                   |                      |                         |                      |                               |                           |                 |              |                             |                                 |              |             |             |
|         | ANOVA             | Variety              | p<0.001                 | p<0.001              | p<0.001                       | p<0.001                   | p<0.001         | p<0.001      | p<0.001                     | p<0.001                         | p<0.001      | p<0.001     | p<0.001     |
|         |                   | Treatment            | p<0.001                 | p<0.001              | p<0.001                       | p<0.001                   | p<0.001         | p<0.001      | p<0.001                     | p<0.001                         | p<0.001      | p<0.001     | p<0.001     |
|         | Variety*Treatment |                      | P=0.319                 | P=0.026              | P=0.003                       | P=0.044                   | p<0.001         | p<0.001      | p<0.001                     | p<0.001                         | p<0.001      | p<0.001     | p<0.001     |
|         |                   |                      |                         |                      |                               |                           |                 |              |                             |                                 |              |             |             |
|         |                   |                      |                         |                      |                               |                           |                 |              |                             |                                 |              |             |             |
|         |                   |                      |                         |                      |                               |                           |                 |              |                             |                                 |              |             |             |
|         |                   |                      |                         |                      |                               |                           |                 |              |                             |                                 |              |             |             |
|         |                   |                      |                         |                      |                               |                           |                 |              |                             |                                 |              |             |             |

The values represent the mean of three soil samples. The Tukey's test showed that the same column of different lowercase letters indicated a significant difference in the 2× plants' NaHCO<sub>3</sub> stress treatment, while different uppercase letters indicated a significant difference in the 4× plants' NaHCO<sub>3</sub> stress treatment (P < 0.05). Significant at the 0.001 level. A0, A1, A2, and A3 represent 2× plants subjected to 0, 50, 100, and 150 mM NaHCO<sub>3</sub> stress treatment, B0, B1, B2, and B3 represent 4× plants subjected to 0, 50, 100, and 150 mM NaHCO<sub>3</sub> stress treatment.

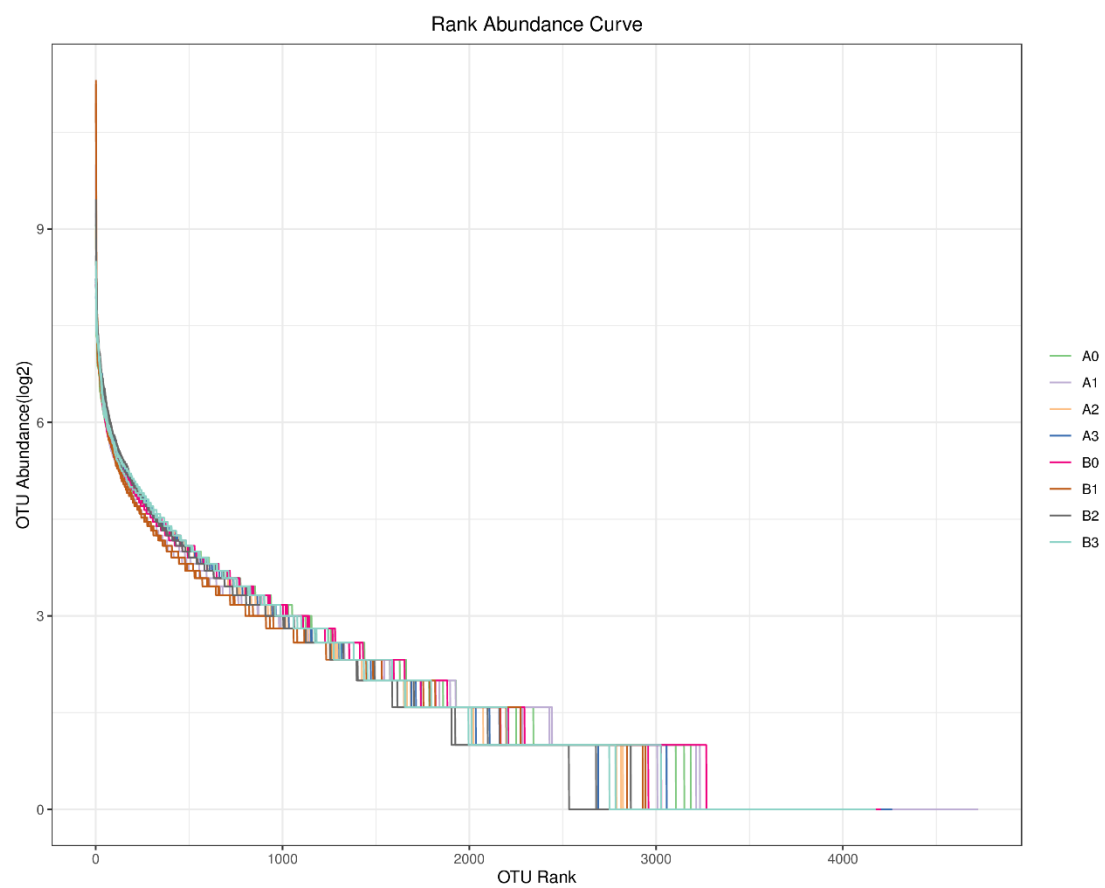

**Figure S1.** Rank abundance curves were generated using bacterial 16S rRNA gene sequences obtained from amplicon sequencing.

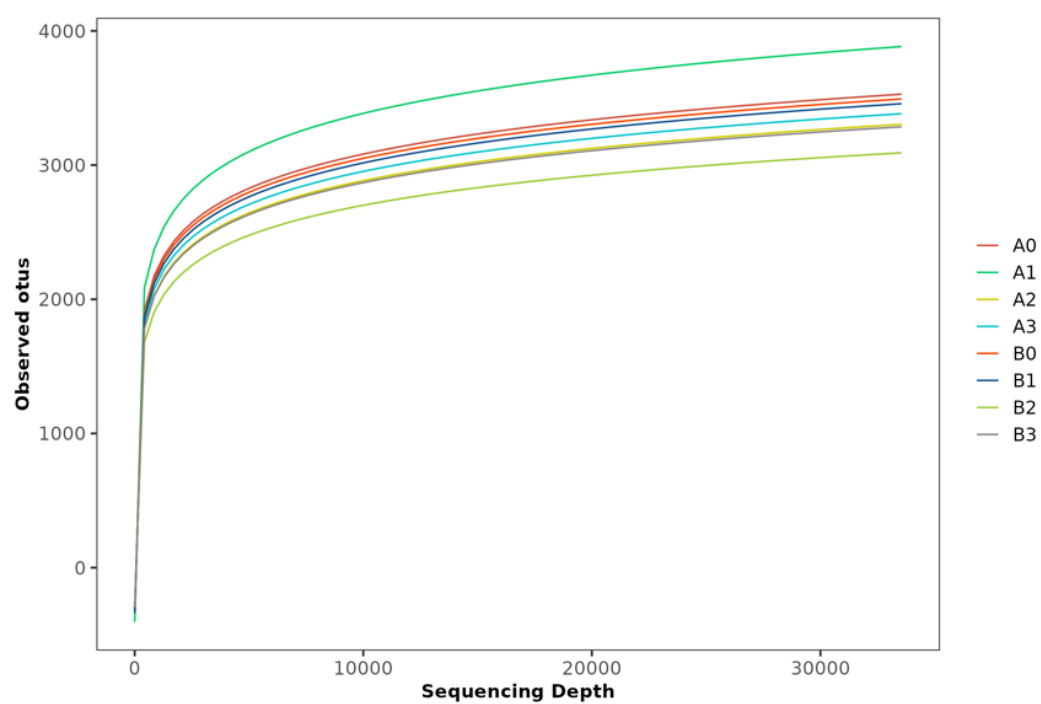

**Figure S2.** Rarefaction Curve of bacterial 16S rRNA gene sequences obtained from amplicon sequencing.

**Table S3.** The correlation between each factor and the principal component of the RDA plot is displayed.

| Indicators | R2     | Pr>(r)  |
|------------|--------|---------|
| S-UE       | 0.3911 | 0.008** |
| S-ACP      | 0.3424 | 0.014*  |
| S-SC       | 0.4129 | 0.005** |
| S-CAT      | 0.6646 | 0.001** |

The R2 of the environmental factor of the RDA chart and the significance p-value.

\*P value < 0.05; \*\*P value < 0.01; \*\*\*P value < 0.001.

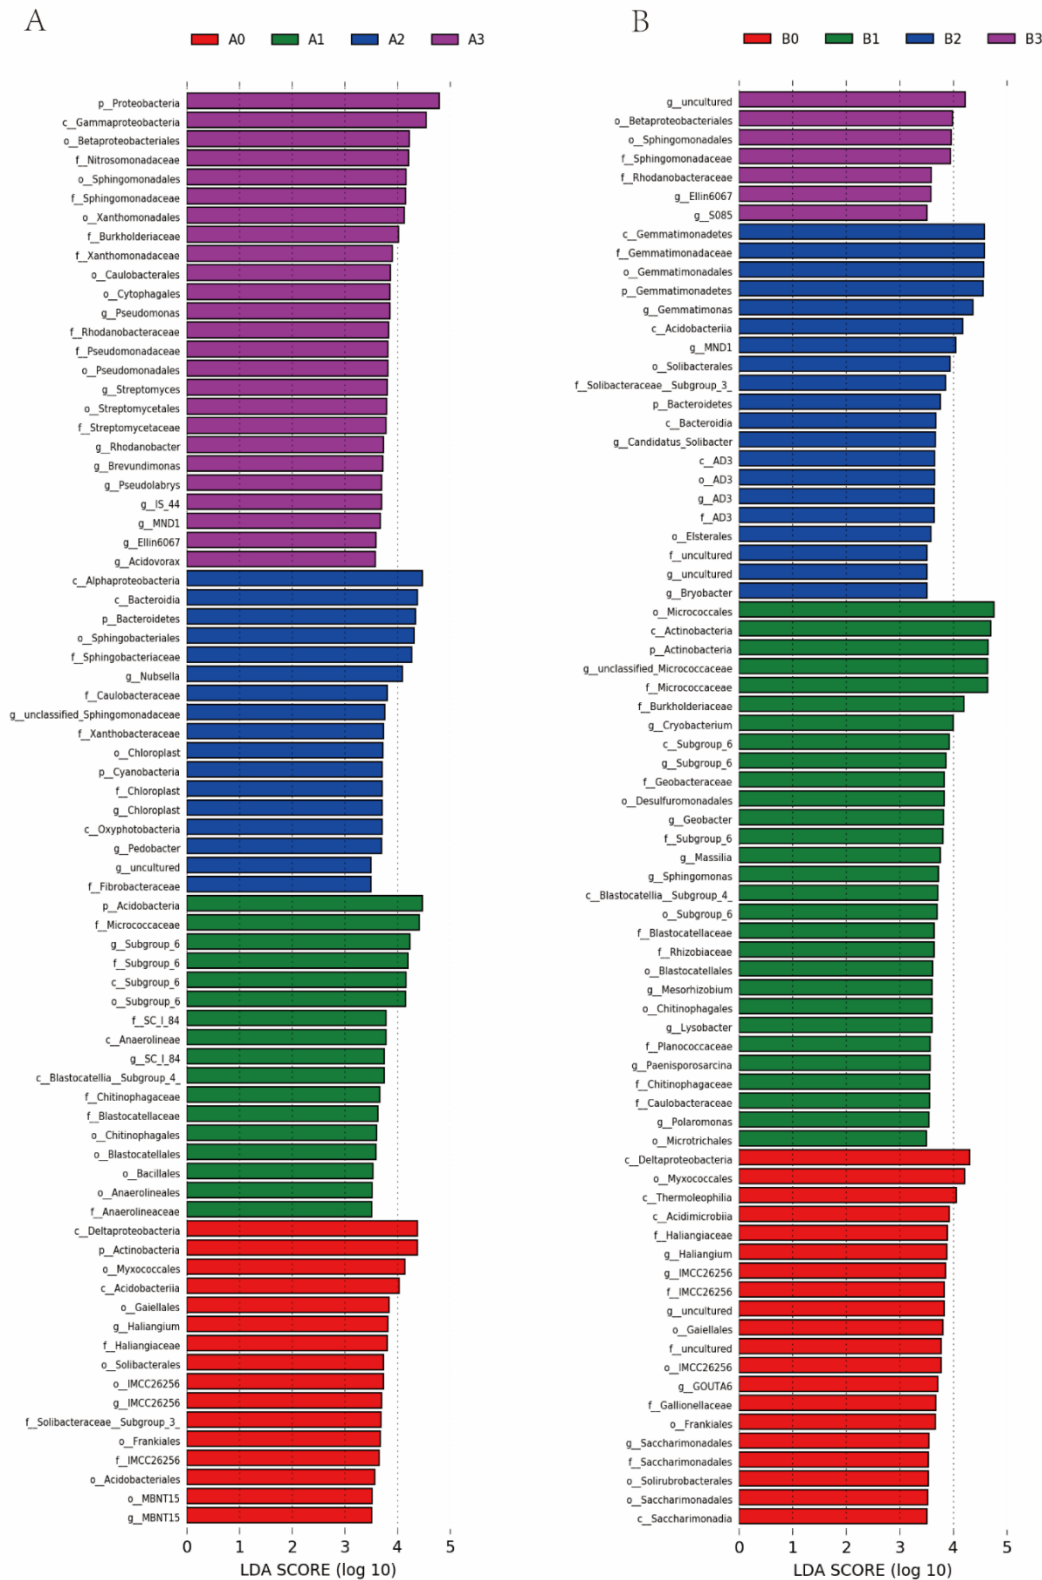

**Figure S3.** Linear discriminant analysis effect size (LEfSe) analysis was conducted to assess the bacterial abundance from phylum to genus (LDA threshold score  $\geq 3.5$ ) in the rhizosphere microbial communities of 2  $\times$  plant (A) and 4  $\times$  plant (B) under different stress concentrations.
